# Supplementary material
Source: Springer Nature journal article supplement (https://www.springermedizin.de/resource/supplementary/13045_2011_177_MOESM1_ESM.pdf/9660822)

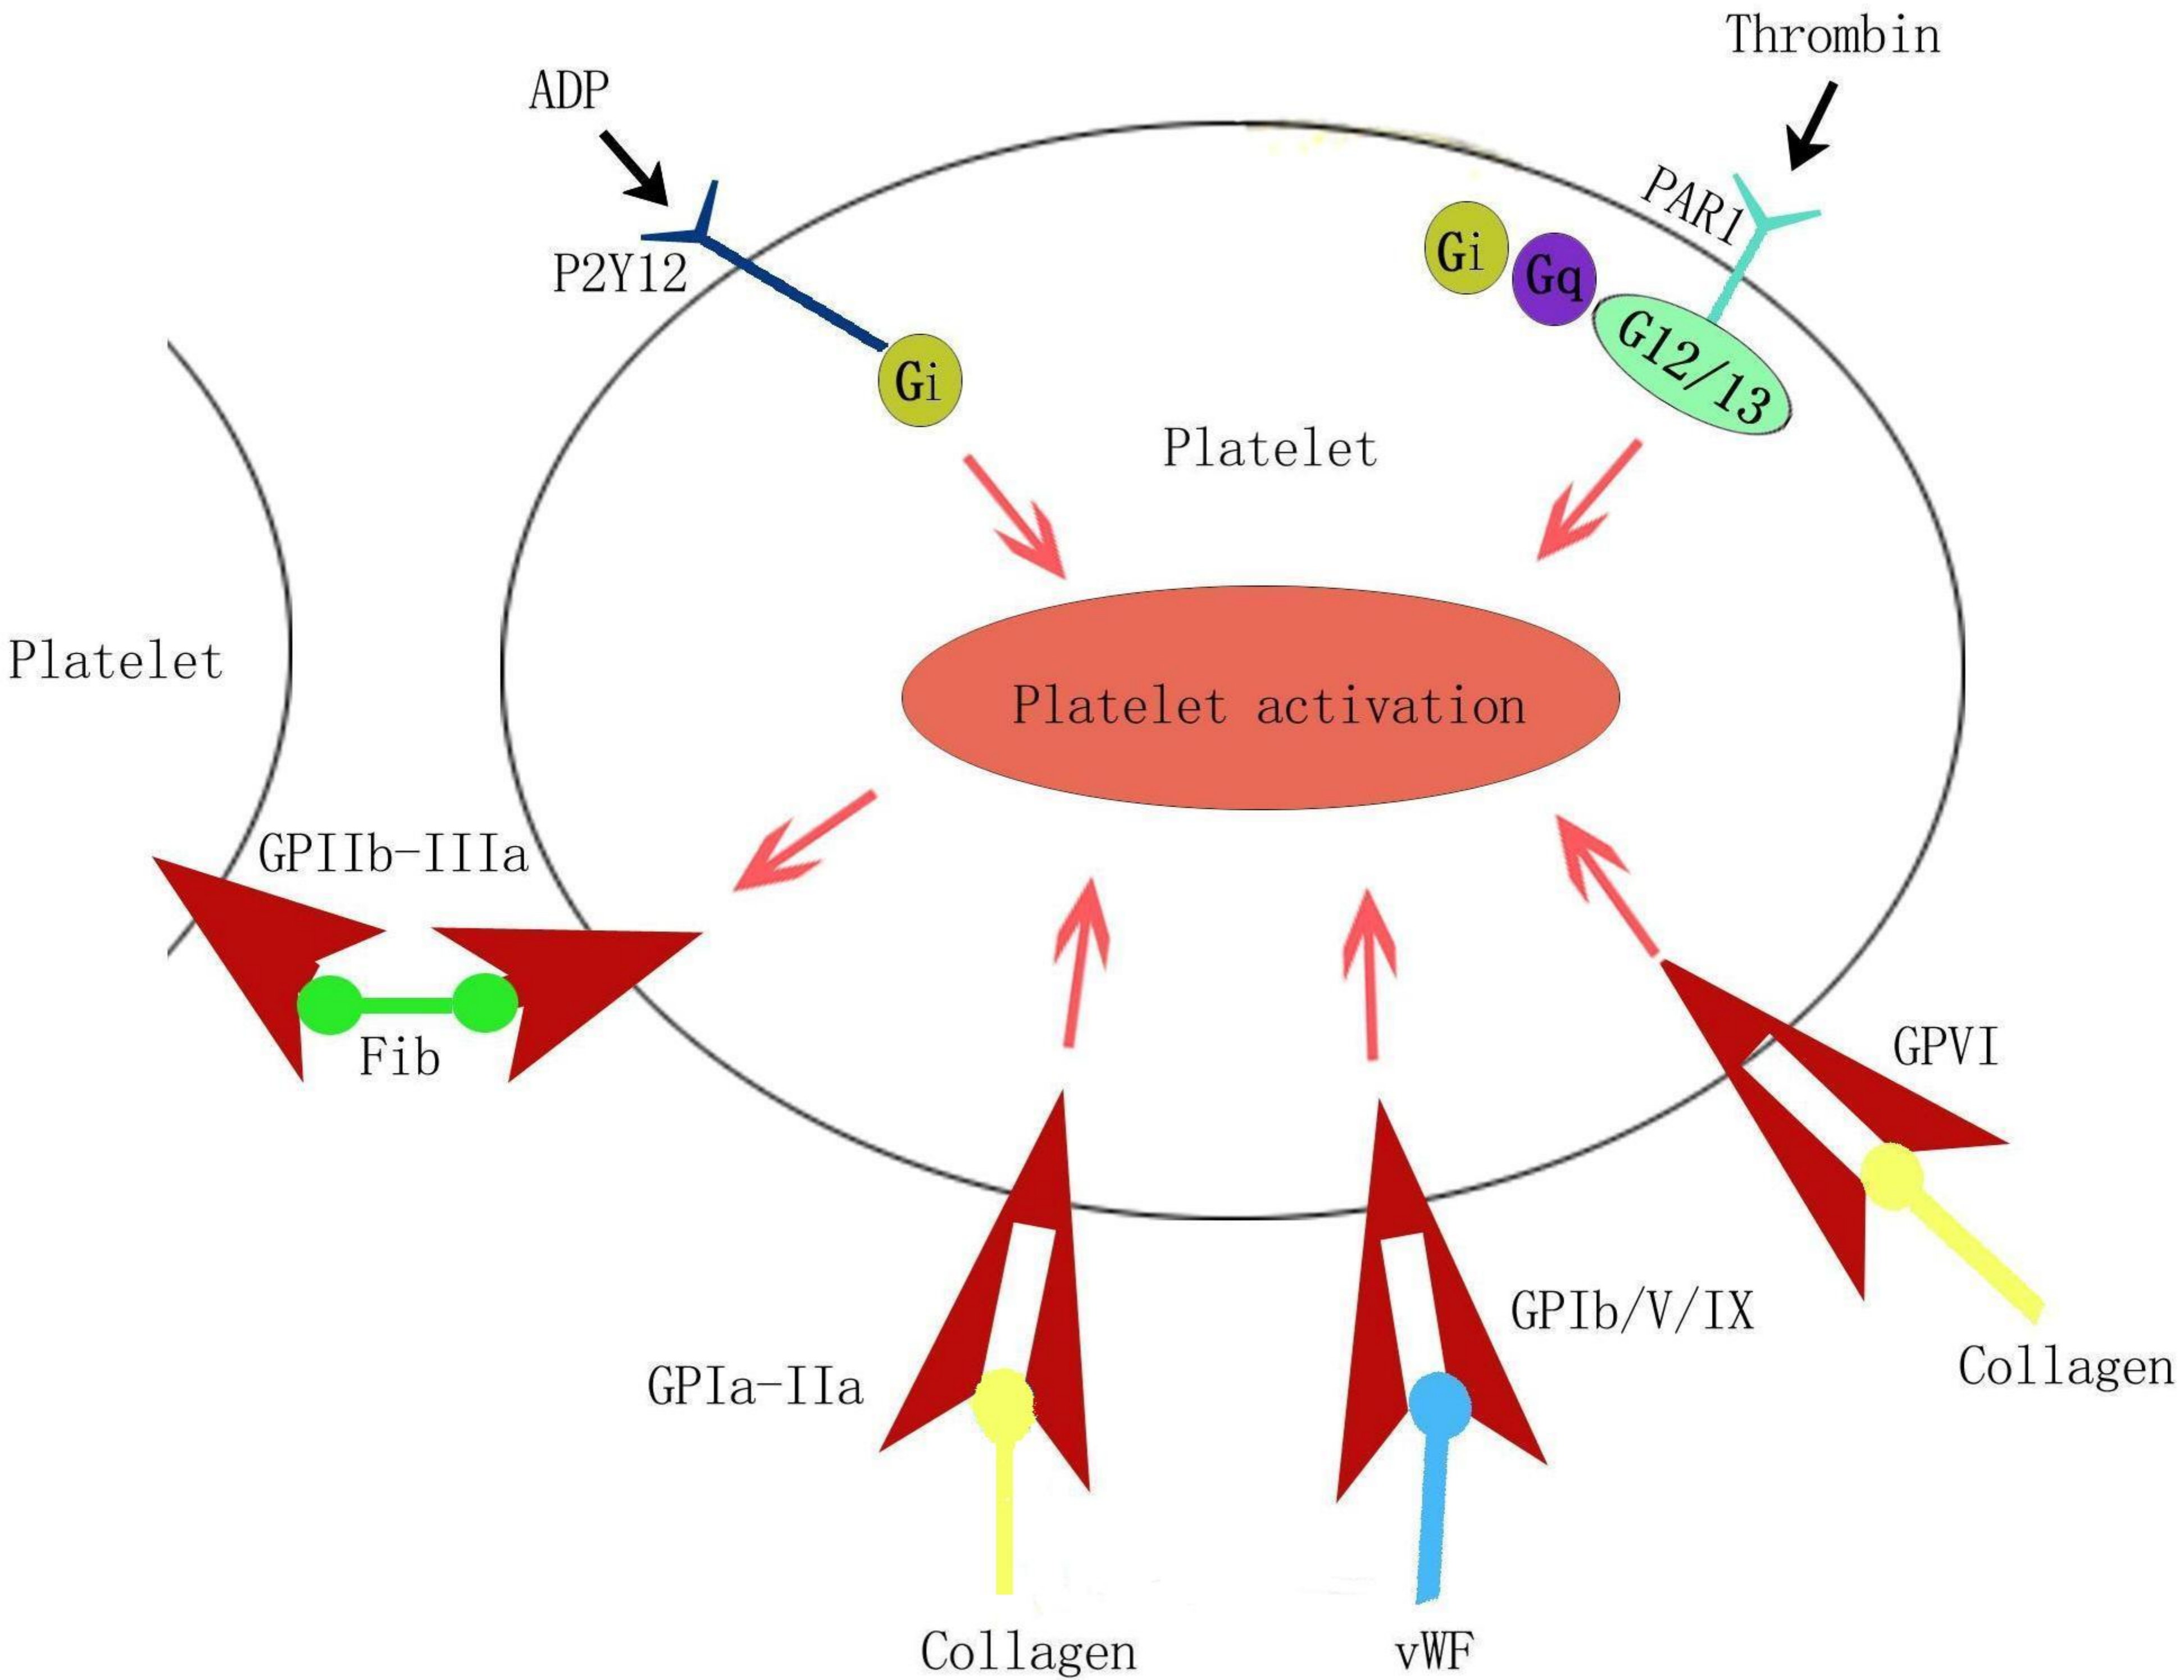

Supplement: MOESM1 [file 9660822]
